# Supplementary material for: The coordination chemistry of copper(i) in liquid ammonia, trialkyl and triphenyl phosphite, and tri-n-butylphosphine solution
Source: Royal Society of Chemistry journal article supplement (doi:10.1039/b400888j), 2004-01-01
Supplement: b400888j.doc [file b400888j.doc]

**Supplementary Material**

**Legends to Figures**

**Fig. S1.** Complex distribution function of the copper(I)-ammonia system in water based on stability constants from refs. 2 and 4.

**Fig. S2.** *k*3-weighted EXAFS data of experimental (solid) and theoretical (dashed) data of Cu(NH3)3]+ in liquid NH3 (no offset), with the theoretical contributing scattering paths: Cu-N (offset –5) and Cu-N-N (offset -10).

**Fig. S3.** *k*3-weighted EXAFS data of experimental (solid) and theoretical (dashed) data of Cu(P(OCH3)3)4]ClO4 **(2)**, with the theoretical contributing scattering paths Cu-P (offset -5), Cu-O (offset -11), Cu-P-O (offset -13) and Cu-P-P (offset -15).

**Fig. S4.** *k*3-weighted EXAFS data of experimental (solid) and theoretical (dashed) data of Cu(P(OCH3)3)4]+ in a mixture of P(OCH3)3 and C4H8O2 with the theoretical contributing scattering paths Cu-P (offset -5), Cu-O (offset -11), Cu-P-O (offset -13) and Cu-P-P (offset -15).

**Fig. S5.** *k*3-weighted EXAFS data of experimental (solid) and theoretical (dashed) data of Cu(P(OC2H5)3)4]ClO4 **(3)**, with the theoretical contributing scattering paths Cu-P (offset -5), Cu-O (offset -11), Cu-P-O (offset -13) and Cu-P-P (offset -15).

**Fig. S6.** *k*3-weighted EXAFS data of experimental (solid) and theoretical (dashed) data of Cu(P(OC2H5)3)4]+ in P(OC2H5)3, with the theoretical contributing scattering paths Cu-P (offset -5), Cu-O (offset -12), Cu-P-O (offset -15) and Cu-P-P (offset -17).

**Fig. S7.** *k*3-weighted EXAFS data of experimental (solid) and theoretical (dashed) data of Cu(P(OCH(CH3)2)3)4]ClO4 **(4)**, with the theoretical contributing scattering paths Cu-P (offset -5), Cu-O (offset -12), Cu-P-O (offset -15) and Cu-P-P (offset -17).

**Fig. S8.** *k*3-weighted EXAFS data of experimental (solid) and theoretical (dashed) data of : Cu(P(OCH(CH3)2)3)4]+ in C4H8O2, with the theoretical contributing scattering paths Cu-P (offset -5), Cu-O (offset -12), Cu-P-O (offset -15) and Cu-P-P (offset -17).

**Fig. S9.** *k*3-weighted EXAFS data of experimental (solid) and theoretical (dashed) data of Cu(P(OC4H9)3)4]+ in P(OC4H9)3, with the theoretical contributing scattering paths Cu-P (offset -5), Cu-O (offset -10), Cu-P-O (offset -12) and Cu-P-P (offset -14).

**Fig. S10.** *k*3-weighted EXAFS data of experimental (solid) and theoretical (dashed) data of Cu(P(OC6H5)3)4]ClO4 **(5)**, with the theoretical contributing scattering paths Cu-P (offset -5), Cu-O (offset -10), Cu-P-O (offset -13) and Cu-P-P (offset -15).

**Fig. S11.** *k*3-weighted EXAFS data of experimental (solid) and theoretical (dashed) data of Cu(P(C4H9)3)4]+ in P(C4H9)3, with the theoretical contributing scattering paths Cu-P (offset -5), Cu-C (offset -10), Cu-P-C (offset -12) and Cu-P-P (offset -14).
