# Supplementary figures and images for: The coordination chemistry of copper(i) in liquid ammonia, trialkyl and triphenyl phosphite, and tri-n-butylphosphine solution
Source: Royal Society of Chemistry journal article supplement (doi:10.1039/b400888j), 2004-01-01

Fig. S1

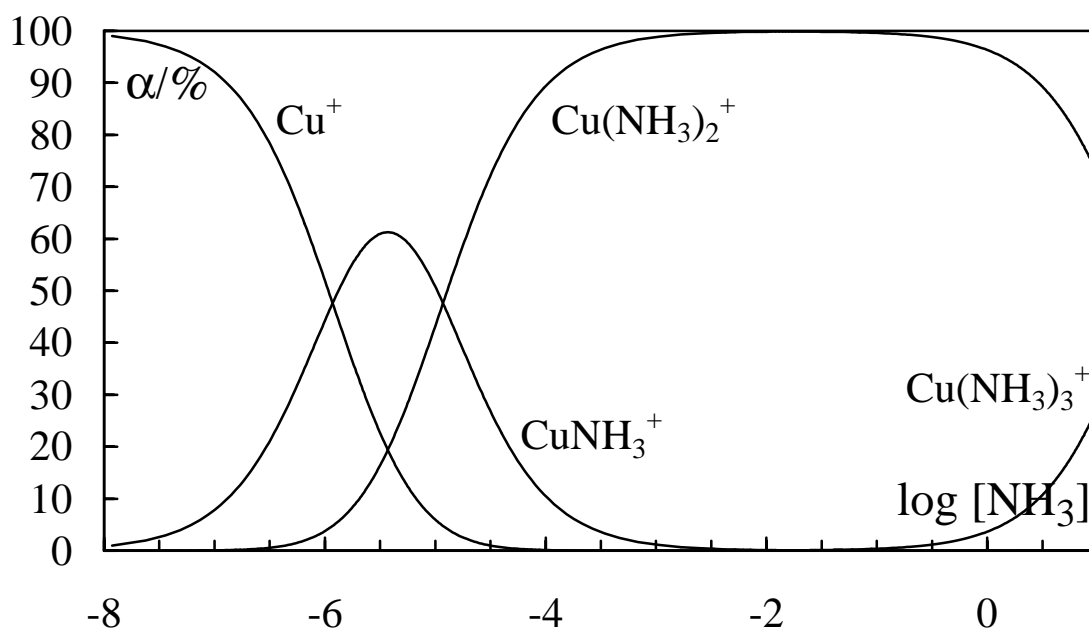

Supplement: b400888j1.pdf [file b400888j1.pdf]

Fig. S10

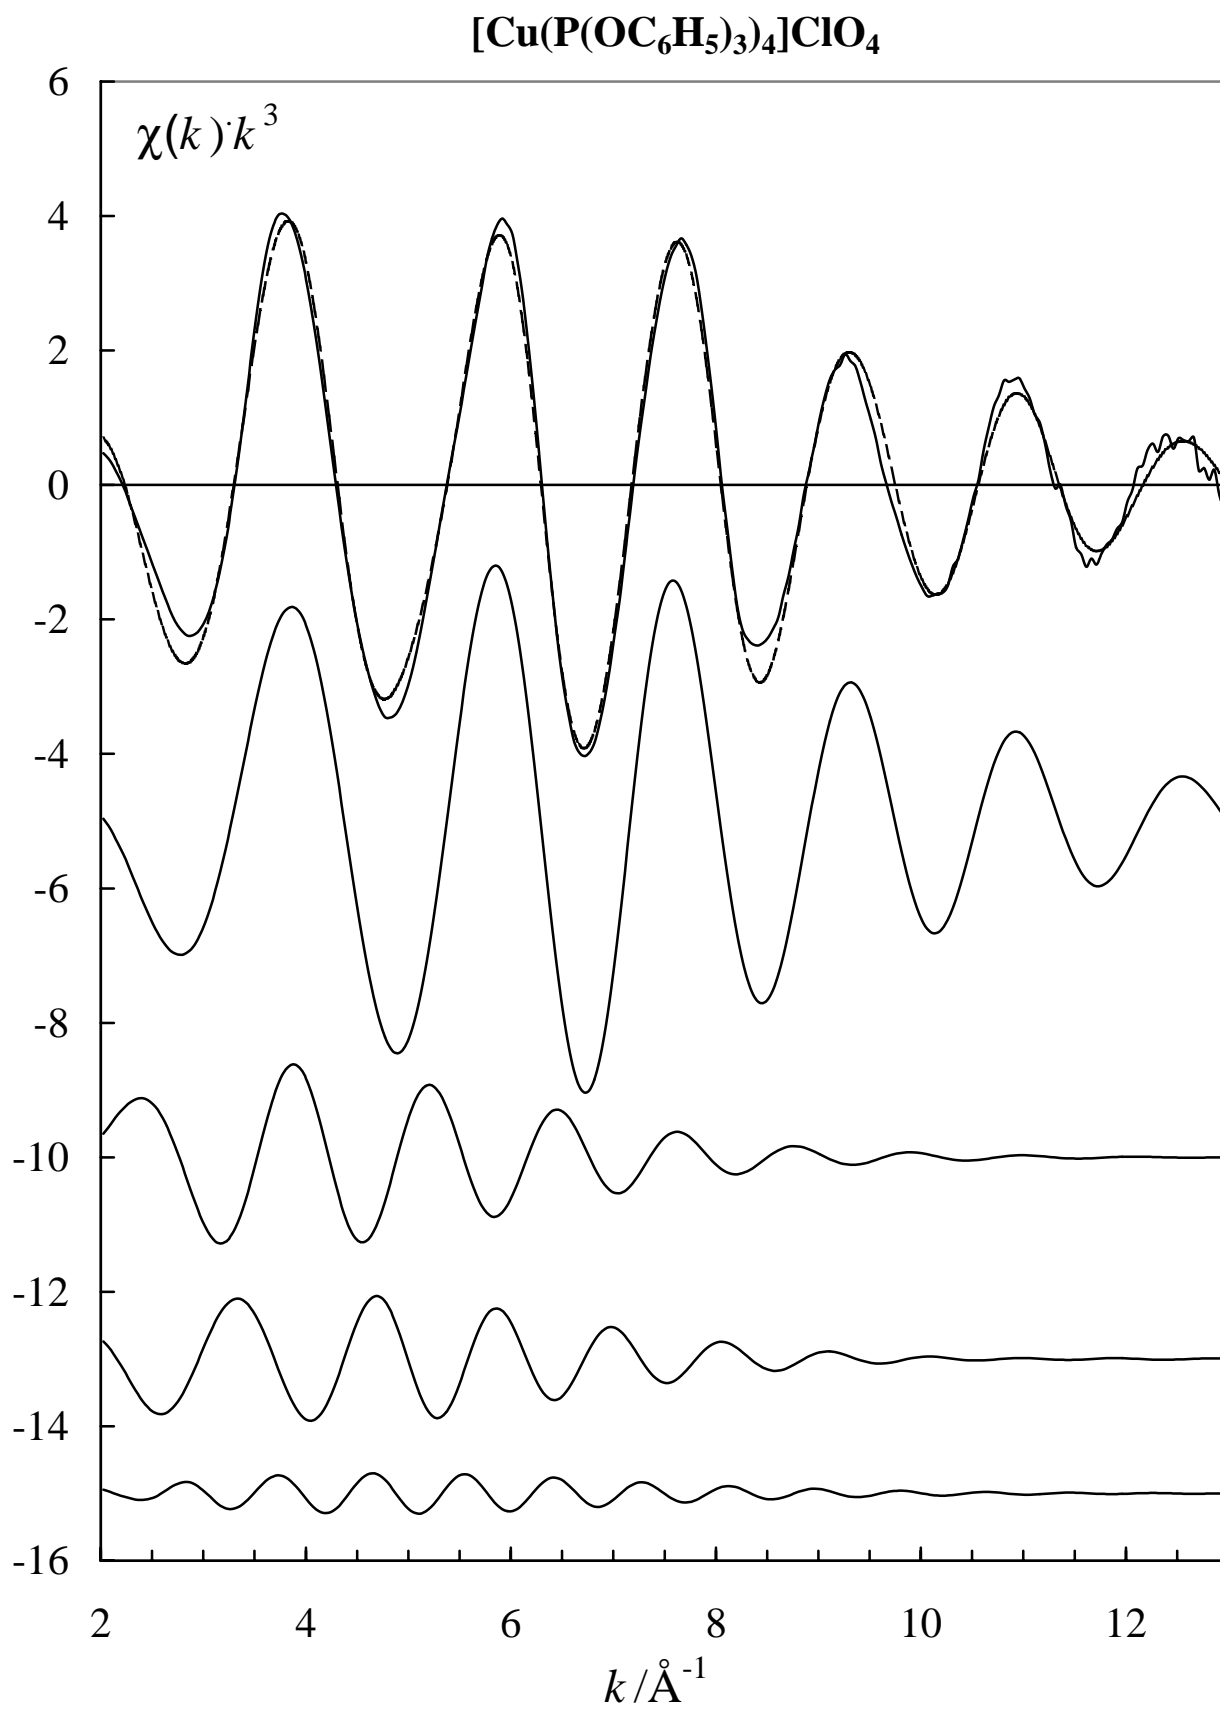

Supplement: b400888j10.pdf [file b400888j10.pdf]

Fig. S11

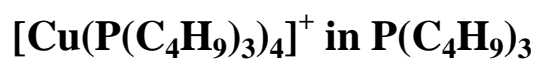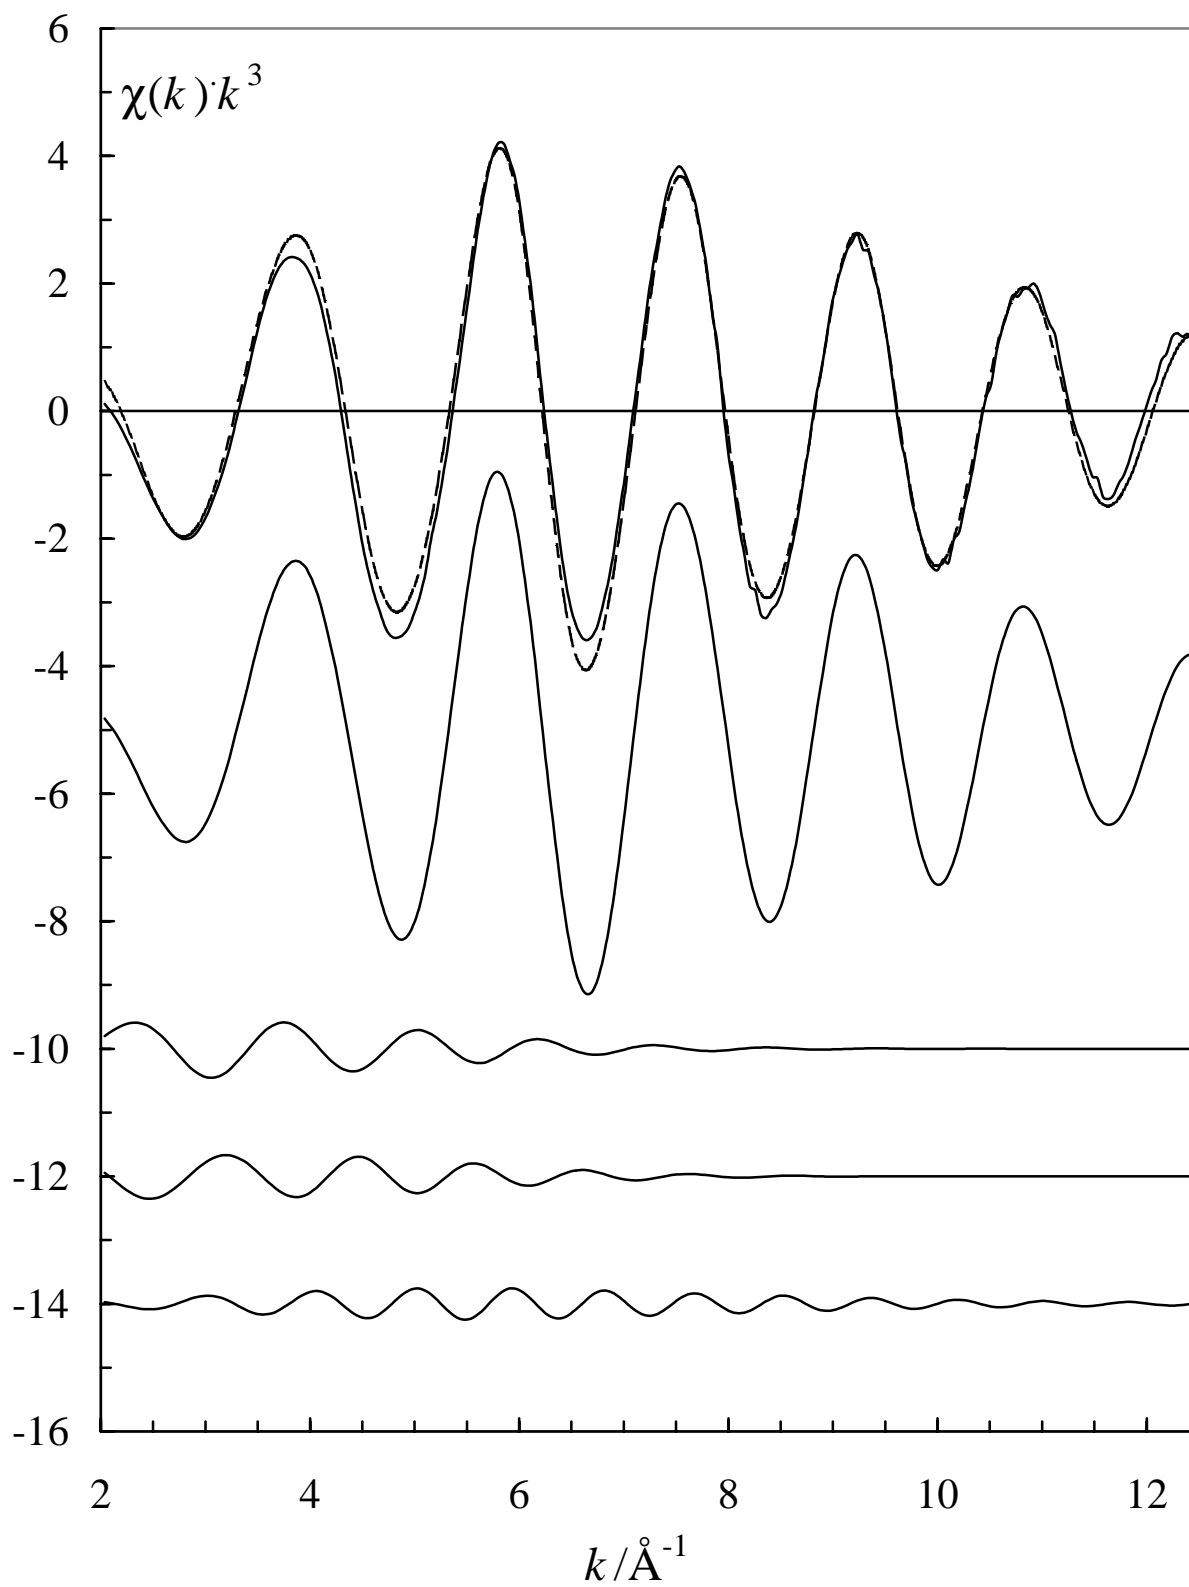

Supplement: b400888j11.pdf [file b400888j11.pdf]

Fig. S2

**[Cu(NH<sub>3</sub>)<sub>3</sub>]<sup>+</sup> in liquid ammonia**

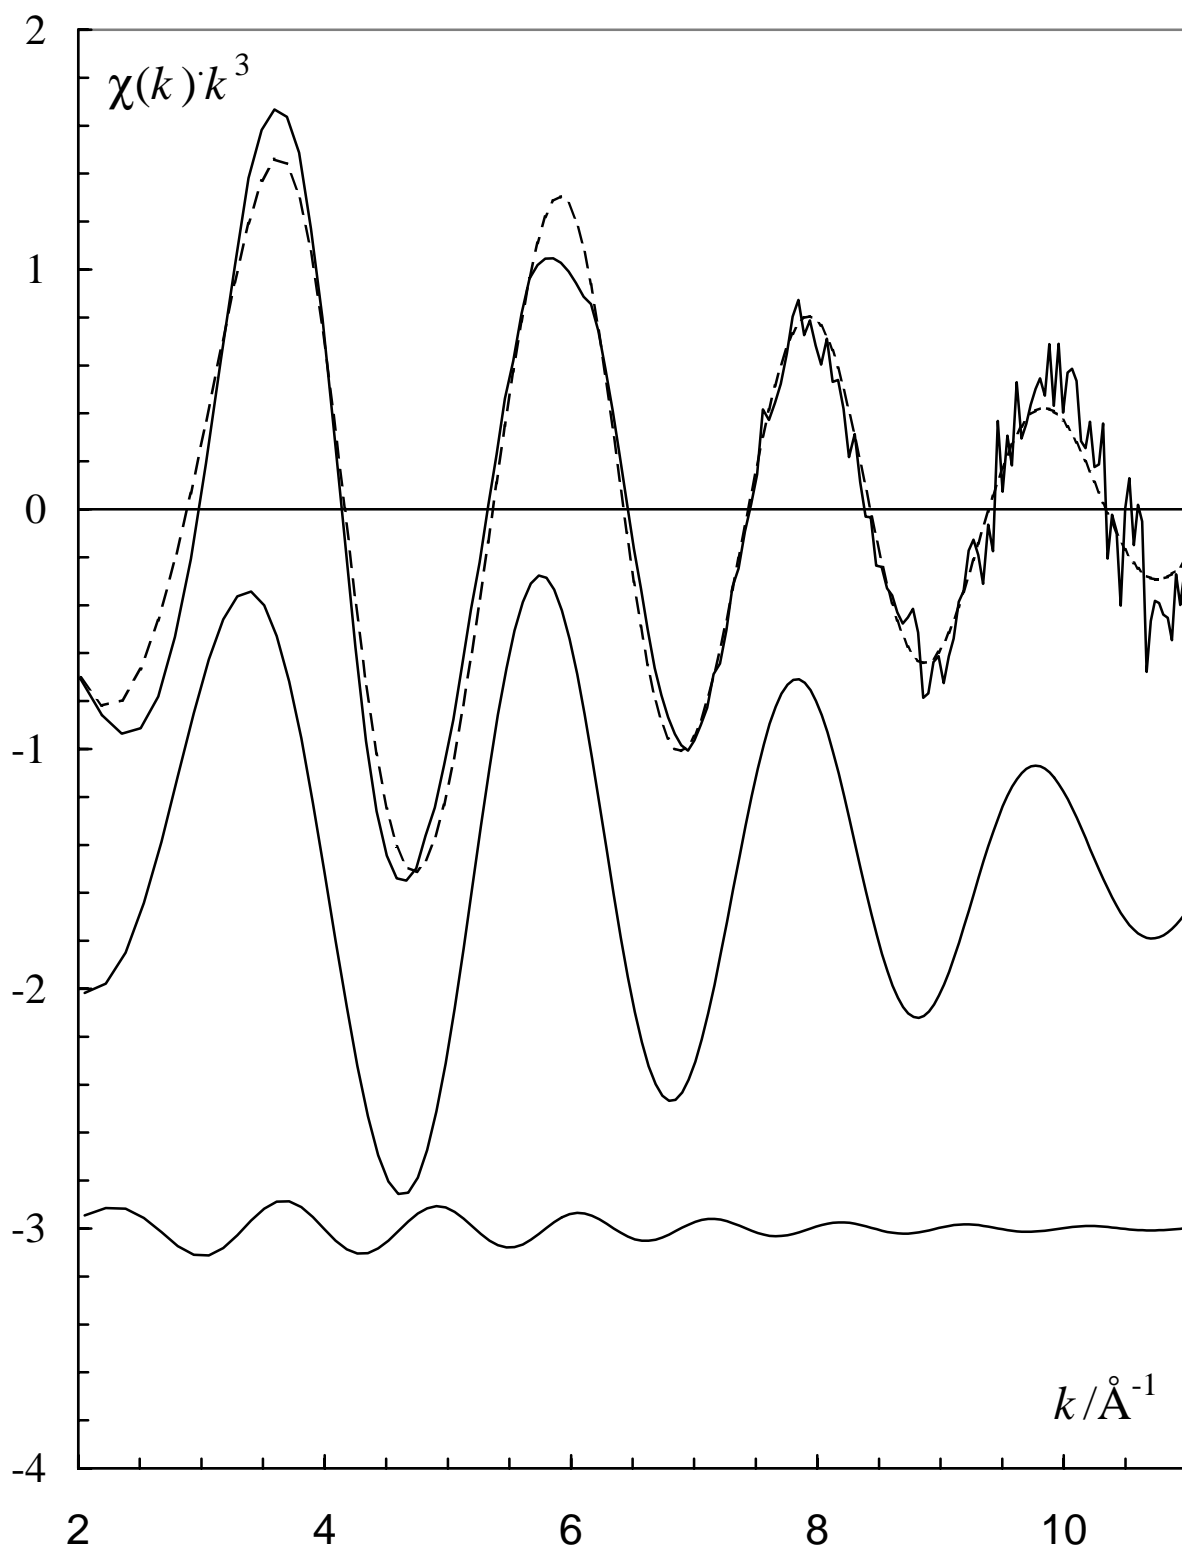

Supplement: b400888j2.pdf [file b400888j2.pdf]

Fig. S3

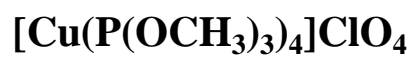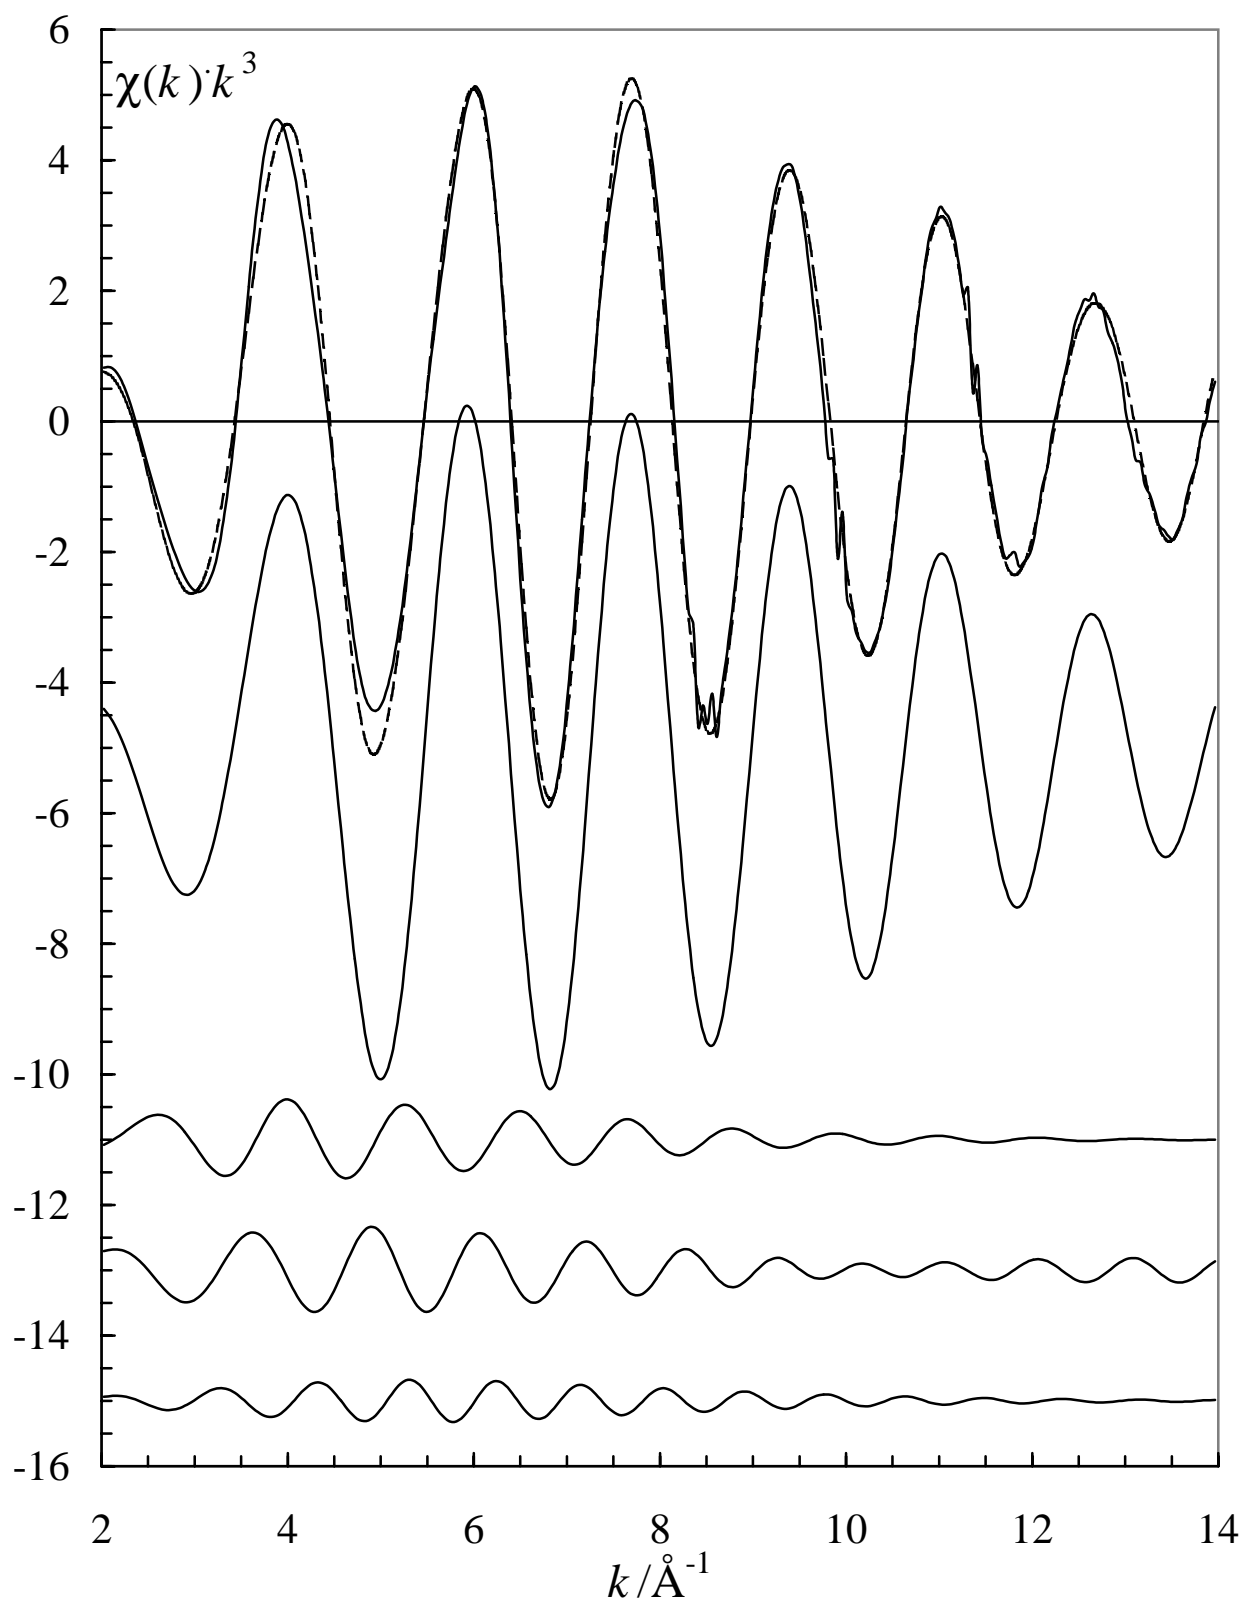

Supplement: b400888j3.pdf [file b400888j3.pdf]

Fig. S4

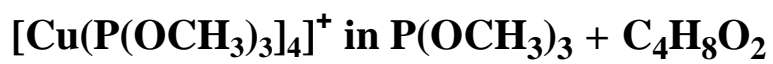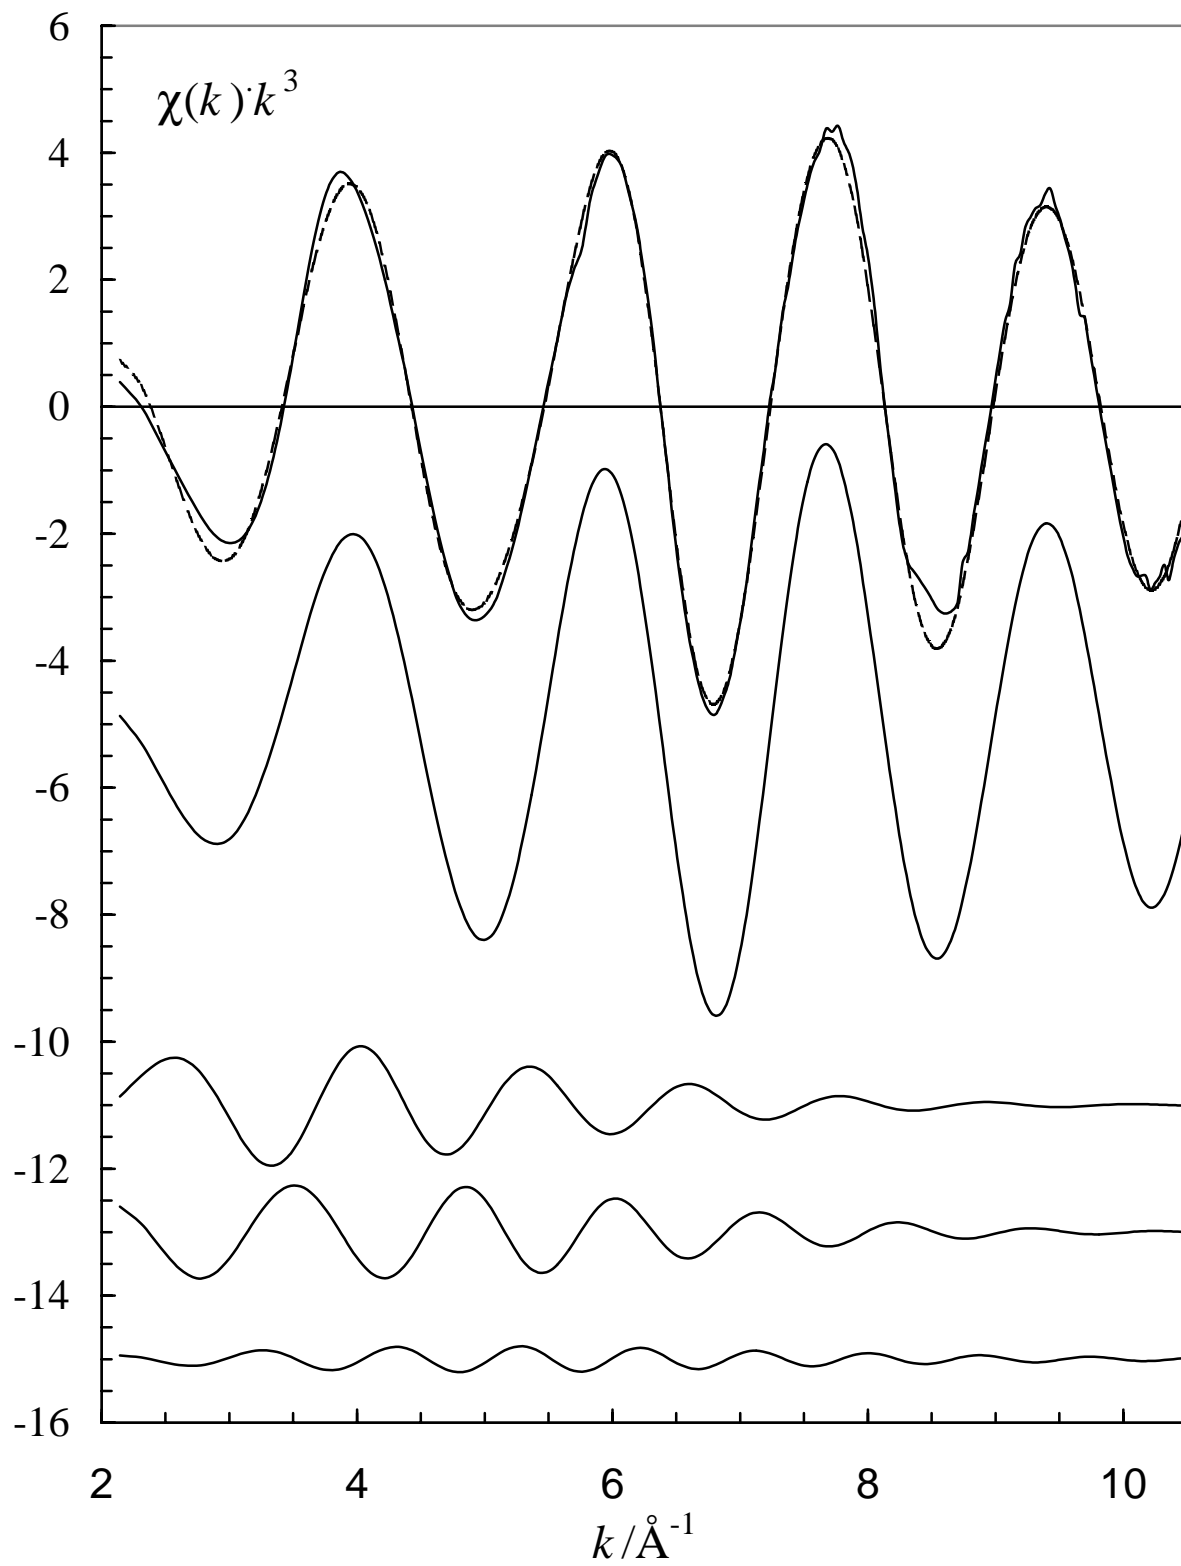

Supplement: b400888j4.pdf [file b400888j4.pdf]

Fig. S5

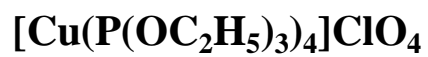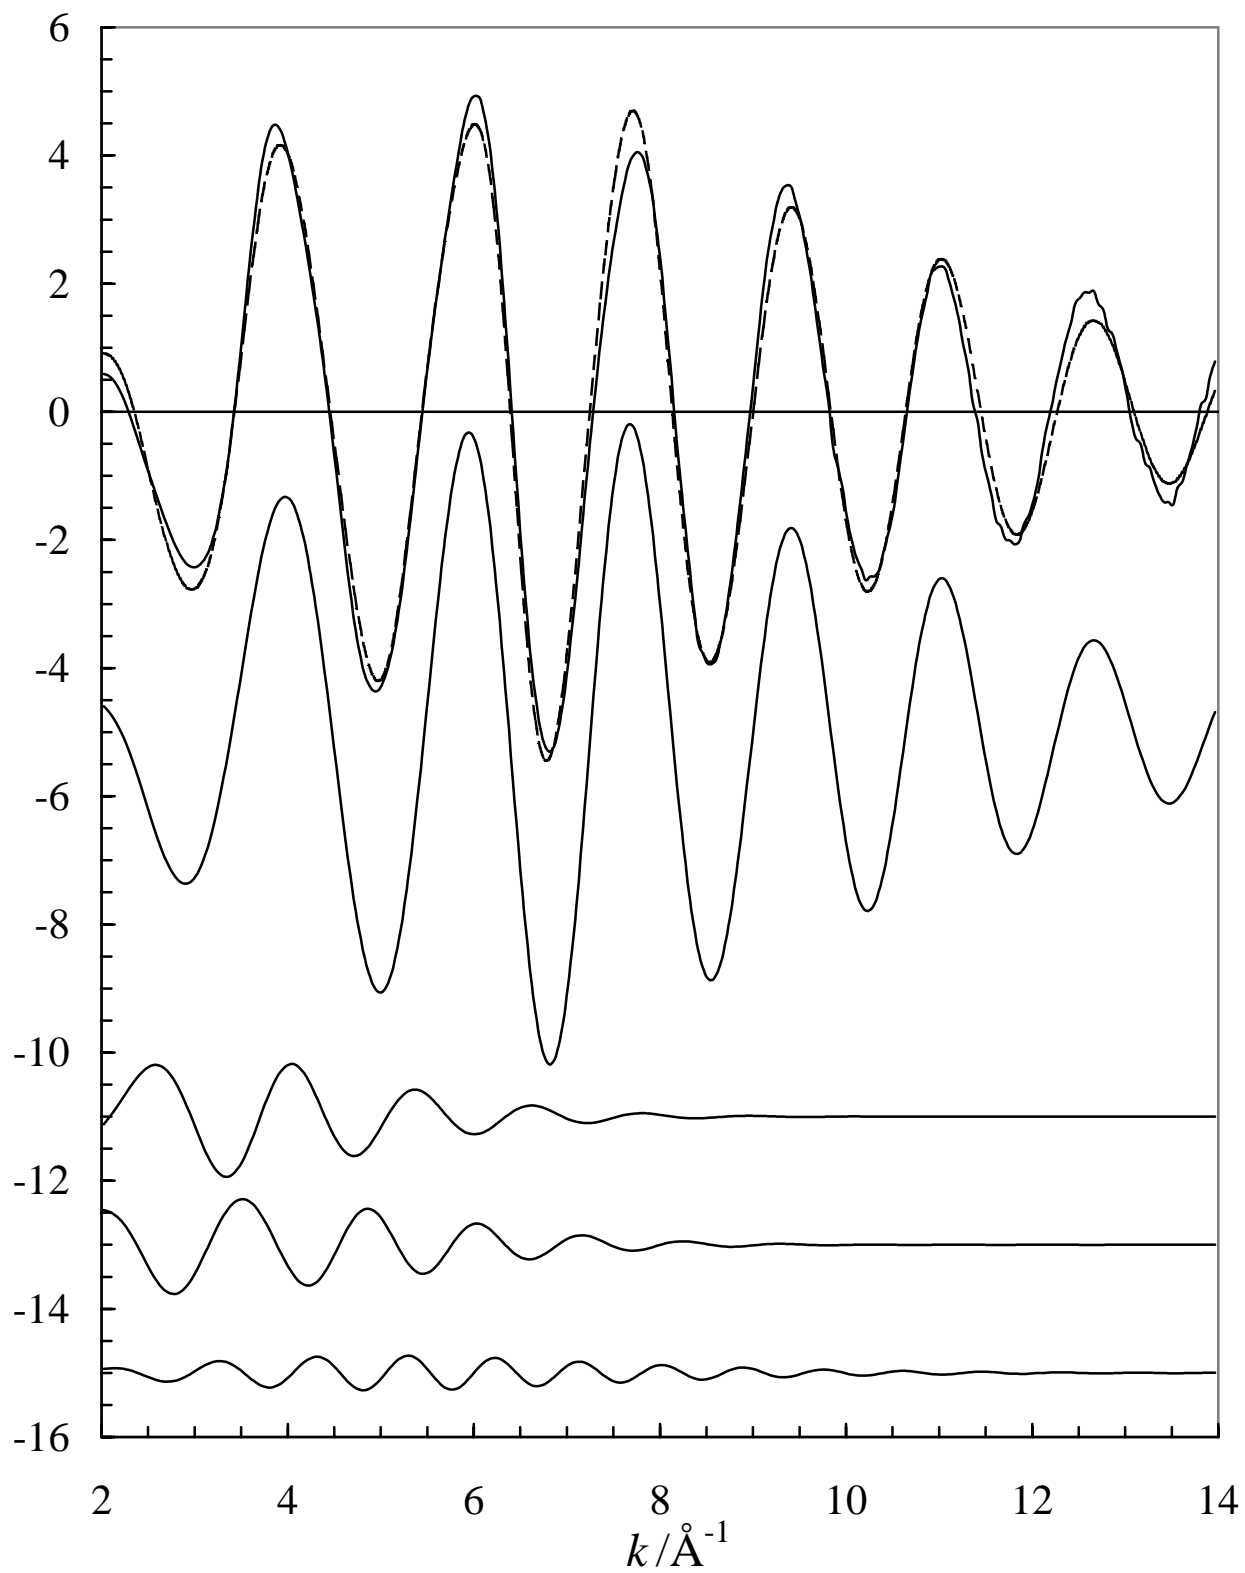

Supplement: b400888j5.pdf [file b400888j5.pdf]

Fig. S6

$[\text{Cu}(\text{P}(\text{OC}_2\text{H}_5)_3)_4]^+$  in  $\text{P}(\text{OC}_2\text{H}_5)_3$

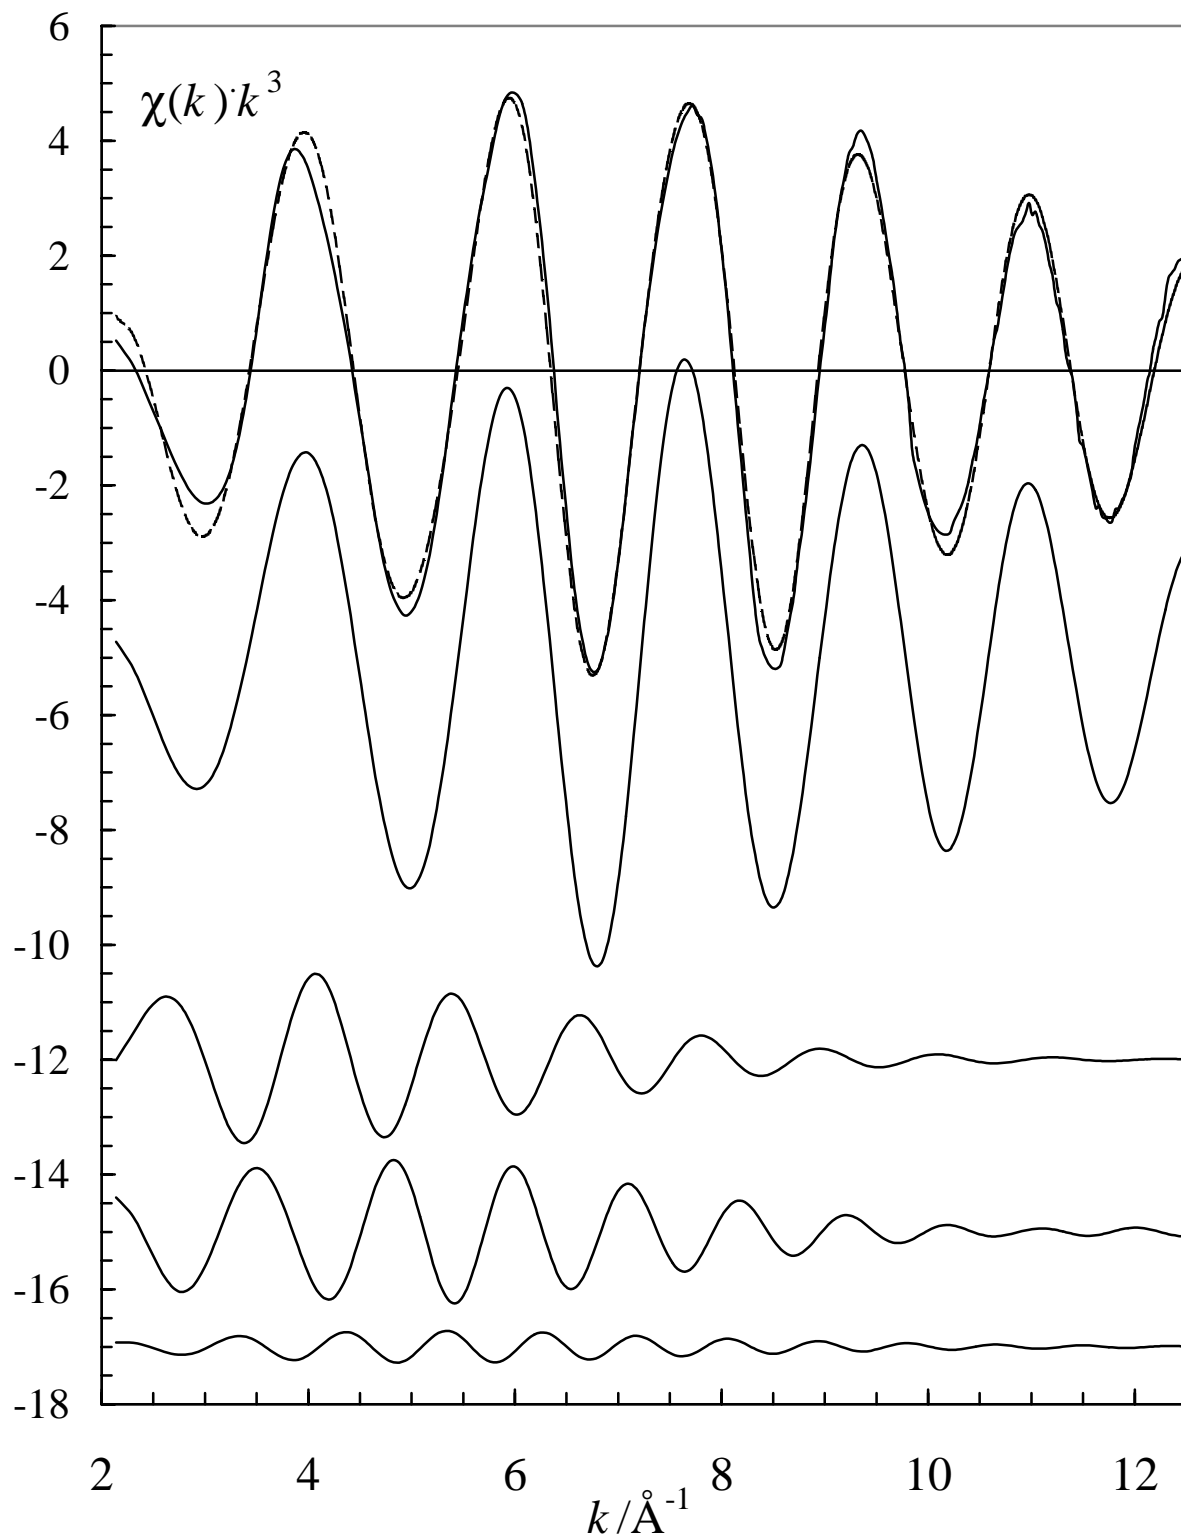

Supplement: b400888j6.pdf [file b400888j6.pdf]

Fig. S7

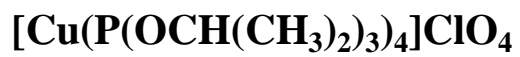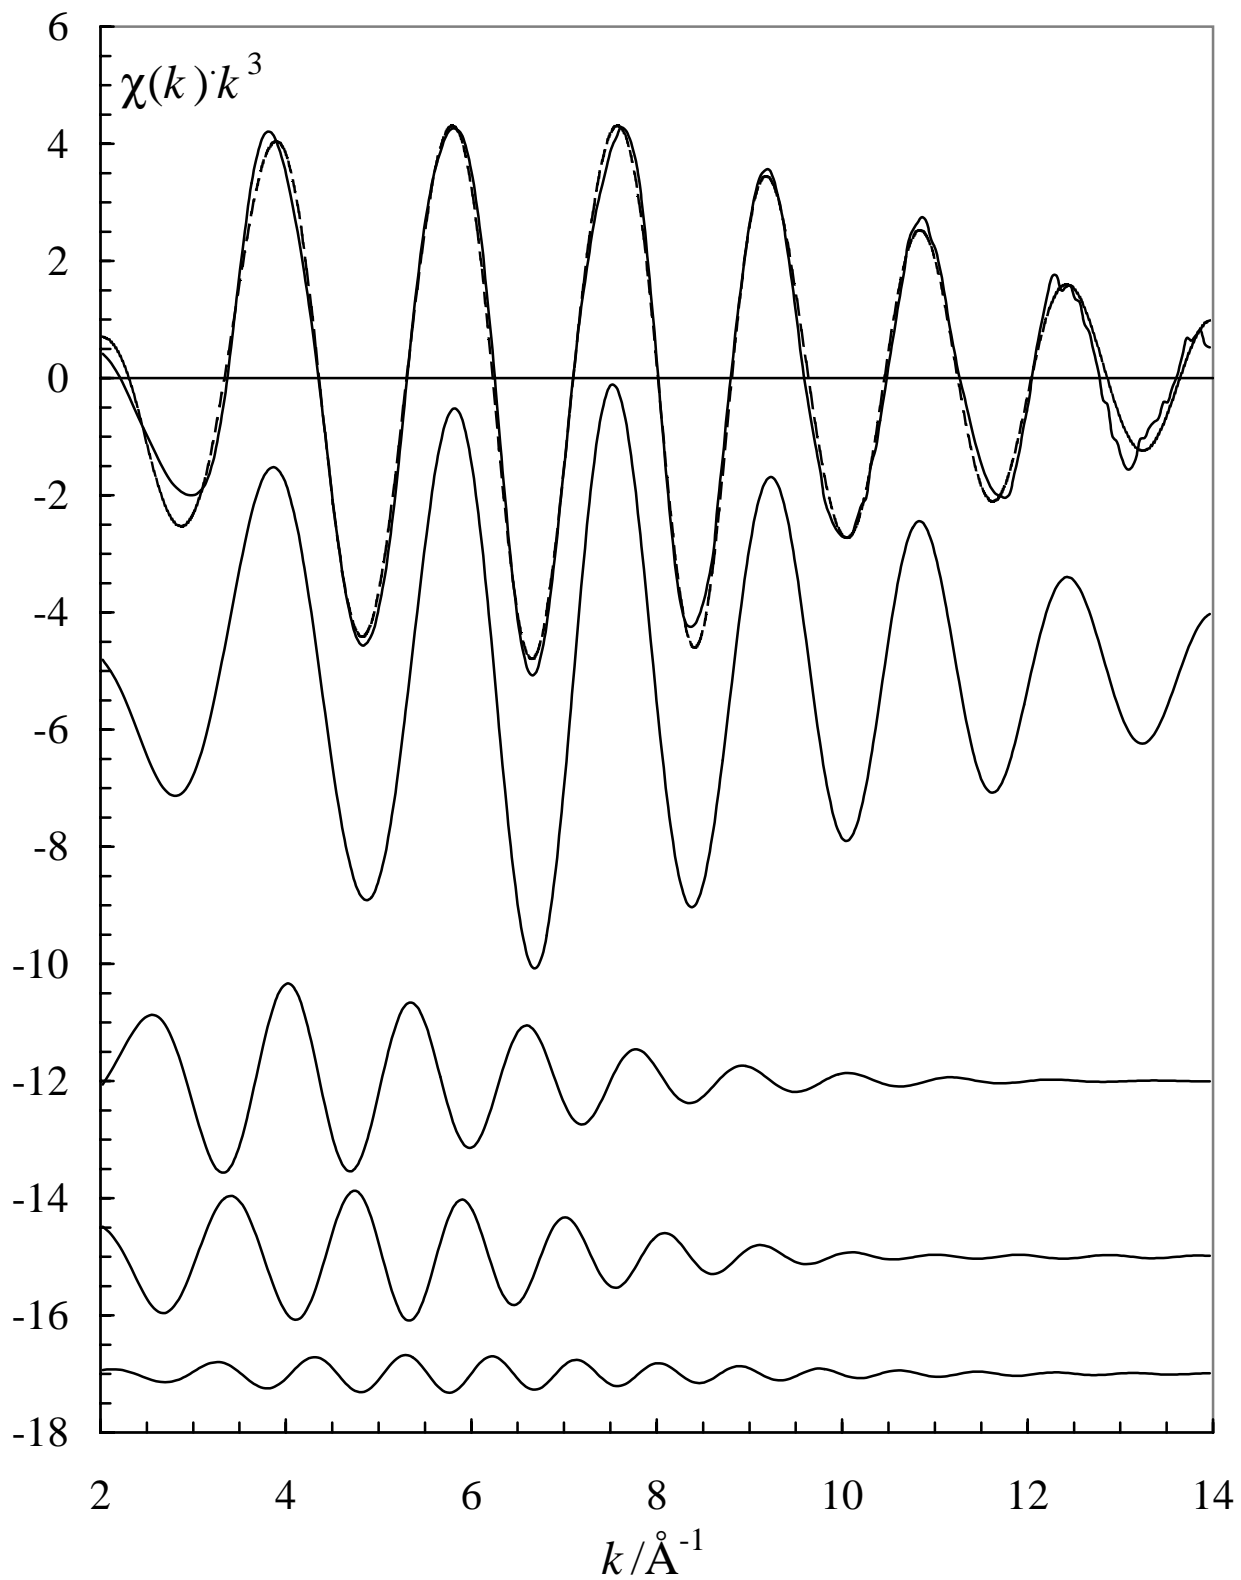

Supplement: b400888j7.pdf [file b400888j7.pdf]

Fig. S8

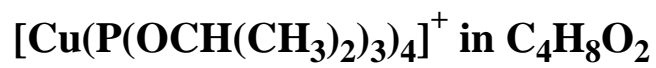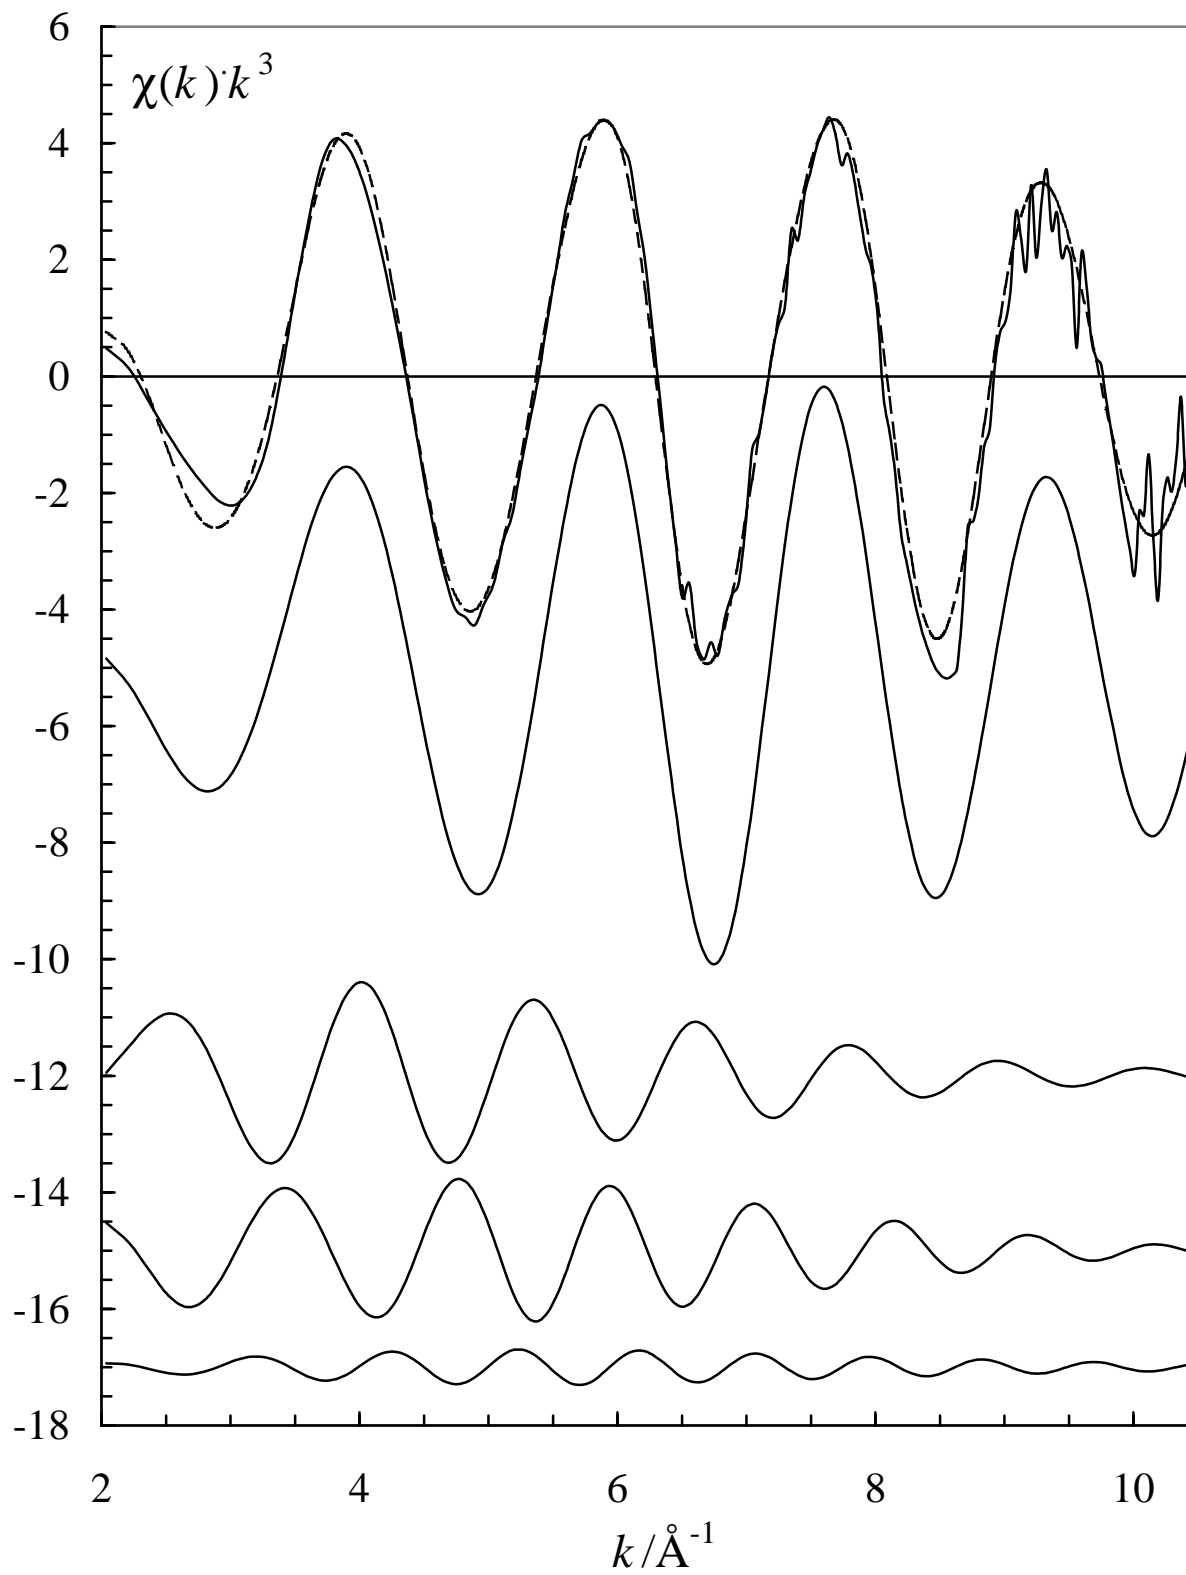

Supplement: b400888j8.pdf [file b400888j8.pdf]

Fig. S9

 $[\text{Cu}(\text{P}(\text{OC}_4\text{H}_9)_3)_4]^+$  in  $\text{P}(\text{OC}_4\text{H}_9)_3$ 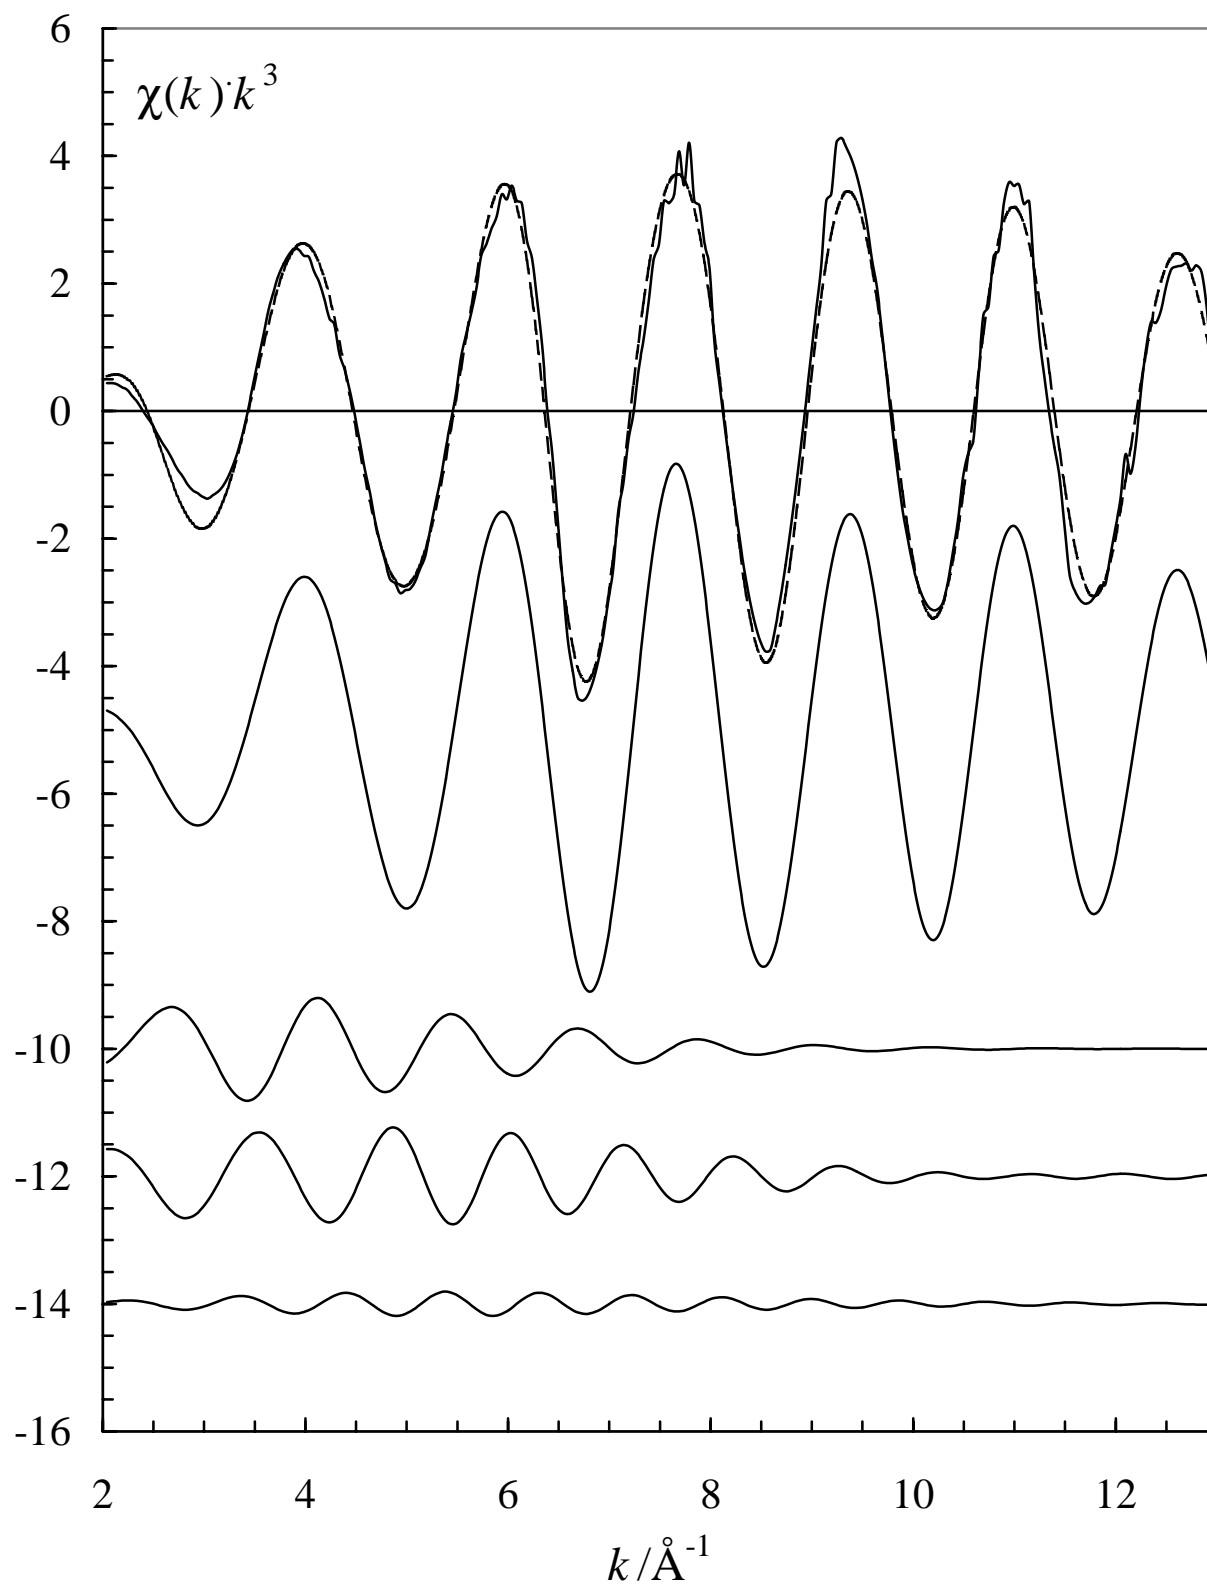

Supplement: b400888j9.pdf [file b400888j9.pdf]
